# Supplementary material for: Transferable single-layer GeSn nanomembrane resonant-cavity-enhanced photodetectors for 2 μm band optical communication and multi-spectral short-wave infrared sensing
Source: Royal Society of Chemistry journal article supplement (doi:10.1039/d1nr07293e), 2022-01-01
Supplement: d1nr07293e1.pdf [file d1nr07293e1.pdf]

## Nanoscale

### Supporting Information

## Transferable single-layer GeSn nanomembrane resonant-cavity-enhanced photodetectors for 2 $\mu\text{m}$ band optical communication and multi-spectral short-wave infrared sensing

Qimiao Chen,<sup>\*a</sup> Shaoteng Wu,<sup>\*a,b</sup> Lin Zhang,<sup>a</sup> Hao Zhou,<sup>a</sup> Weijun Fan<sup>a</sup> and Chuan Seng Tan<sup>a,c</sup>

### SI1. A multi-spectral SWIR sensing system based on GeSn nanomembrane resonant-cavity-enhanced photodetectors

Figure S1 shows a potential multi-spectral sensing system based on the GeSn nanomembrane resonant-cavity-enhanced photodetectors (GeSn NM RCE PDs) with specific spectral responses (sensitive to band 1 or band 2). Multi-pixel array, consisting of GeSn NM RCE PDs with specific spectral responses, receives the reflected/transmitted/emitted light from the object. Then, the captured raw images are decomposed into sub-sampled images and further demosaicked to generate the final multispectral image.

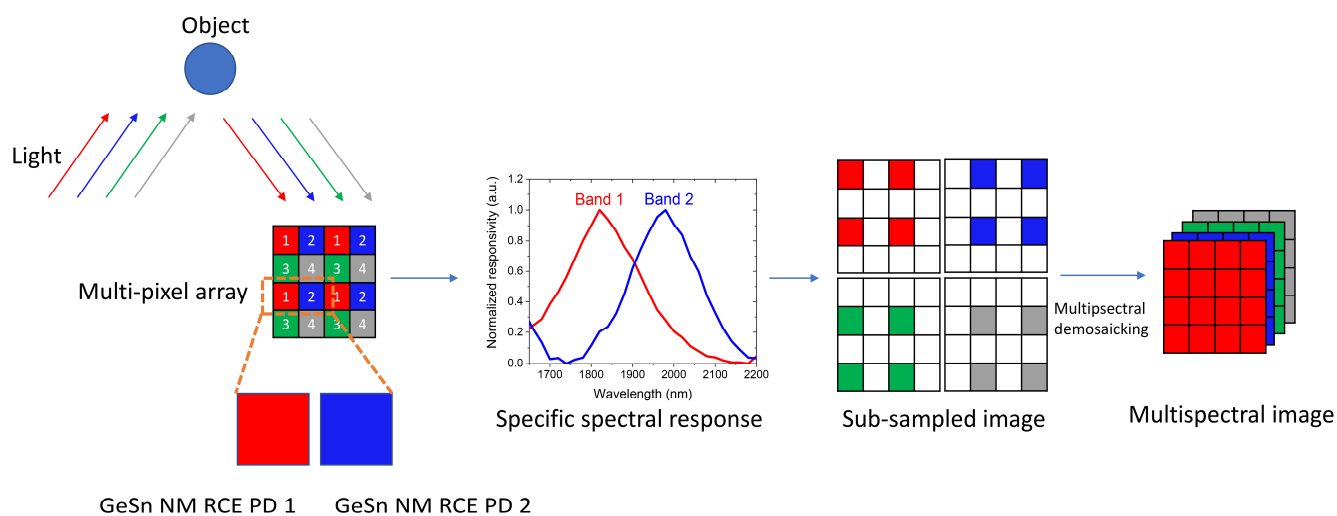

**Figure S1** A schematic of a GeSn-nanomembrane-resonant-cavity-enhanced-photodetector-based multi-spectral SWIR sensing system.

<sup>a</sup> School of Electrical and Electronic Engineering, Nanyang Technological University, Singapore 639798, Singapore. E-mail: chenqm@ntu.edu.sg; wst@semi.ac.cn

<sup>b</sup> State Key Laboratory of Superlattices and Microstructures, Institute of Semiconductors, Chinese Academy of Sciences, Beijing 100083, P.R. China

<sup>c</sup> Institute of Microelectronics, A\*STAR, Singapore 117685, Singapore.
